# Supplementary material for: Trace-level detection of sulfonamide antibiotics using quaternary ammonium polymeric ionic liquid-based effervescence-enhanced dispersive solid-phase extraction followed by LC-DAD analysis in environmental waters
Source: Royal Society of Chemistry journal article supplement (doi:10.1039/d2ra02488h), 2022-01-01
Supplement: d2ra02488h1.pdf [file d2ra02488h1.pdf]

**Supplementary Figure captions:**

**Supplementary Fig. 1.** The schematic diagram of the synthetic routes for [VBTHEA]Cl (a) and P[VBTHEA]Cl (b).

**Supplementary Fig. 2.** The photographs of the synthetic [VBTHEA]Cl and P[VBTHEA]Cl. (a) [VBTHEA]Cl when fortified at the ethanol volume of 30 mL, (b) [VBTHEA]Cl when fortified at the ethanol volume of 20 mL, and (c) [VBTHEA]Cl when fortified at the ethanol volume of 10 mL. (d) P[VBTHEA]Cl when fortified at the ethanol volume of 30 mL, (e) P[VBTHEA]Cl when fortified at the ethanol volume of 20 mL, and (f) P[VBTHEA]Cl when fortified at the ethanol volume of 10 mL.

**Supplementary Fig. 3.** The profiles for each step in the QAP-EDSE procedures

Note: (a) addition of 8 mL sample solution; (b) addition of effervescent tablets; (c) the generation of CO<sub>2</sub>; (d) homogenous solution after effervescence; (e) absorbents settle after the end of effervescence reaction; (e) solid-liquid phase separation after station.

**Supplementary Fig. 4.** The photographs of the synthetic P[VBTHEA]Cl. (a) The fortified dosage of AIBN at 50 mg, (b) 60 mg, and (c) 70 mg.

**Supplementary Fig. 5.** Optimization of the synthetic conditions. (a) Effect of the ethanol volume on the yield of P[VBTHEA]Cl; and (b) Effect of the fortified amount of AIBN on the yield of P[VBTHEA]Cl.

**Supplementary Fig. 6.** Total ion chromatograms of five kinds of sulfonamides in real-world water sample (20 µg L<sup>-1</sup>)

**Supplementary Table legends:**

**Supplementary Table 1.** The physico-chemical properties and molecular structures of five SAs

**Supplementary Table 2.** Mass spectrometric parameters for five SAs

**Supplementary Table 3.** Effects of varying acid-base mass ratios on the physico-chemical properties of effervescent tablets

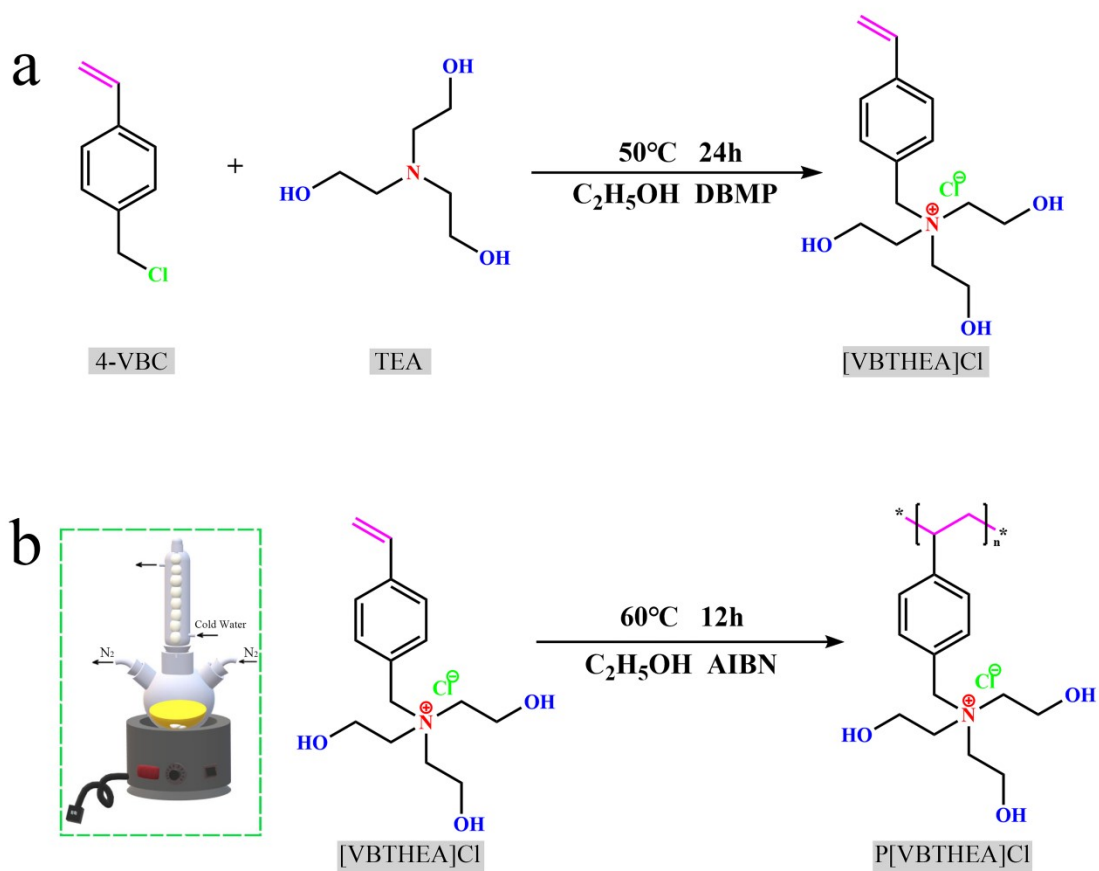

Supplementary Fig. 1

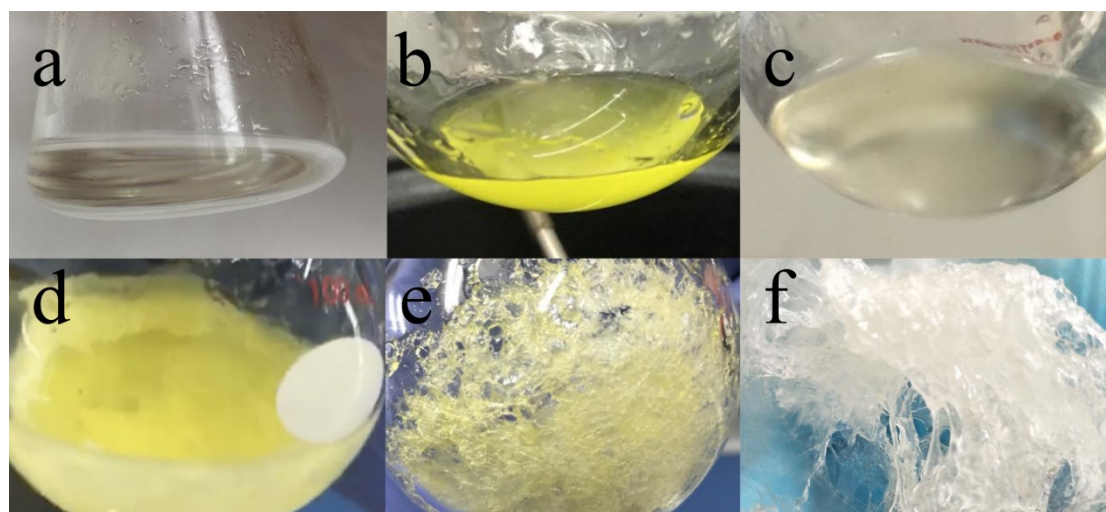

Supplementary Fig. 2

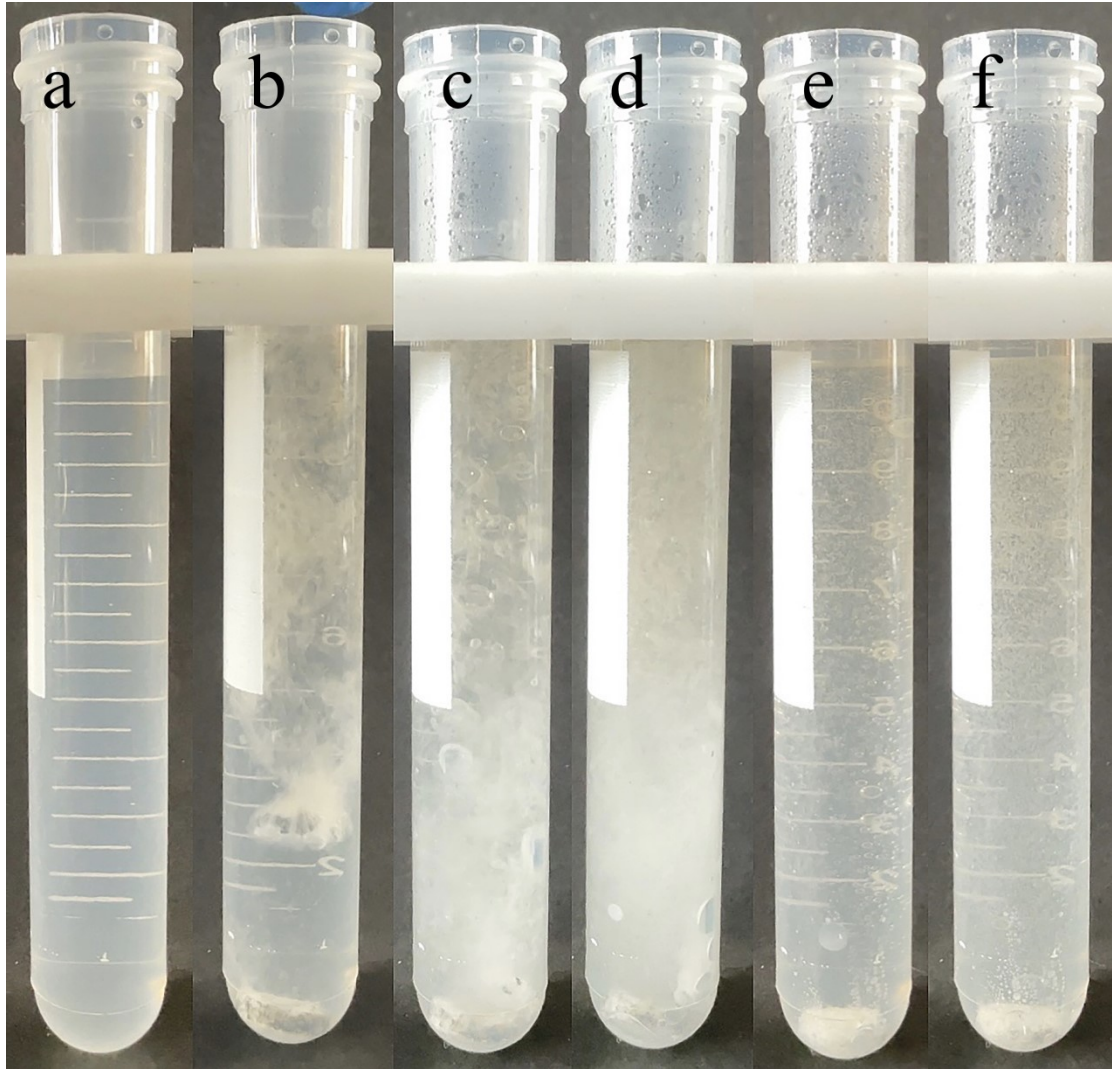

Supplementary Fig. 3

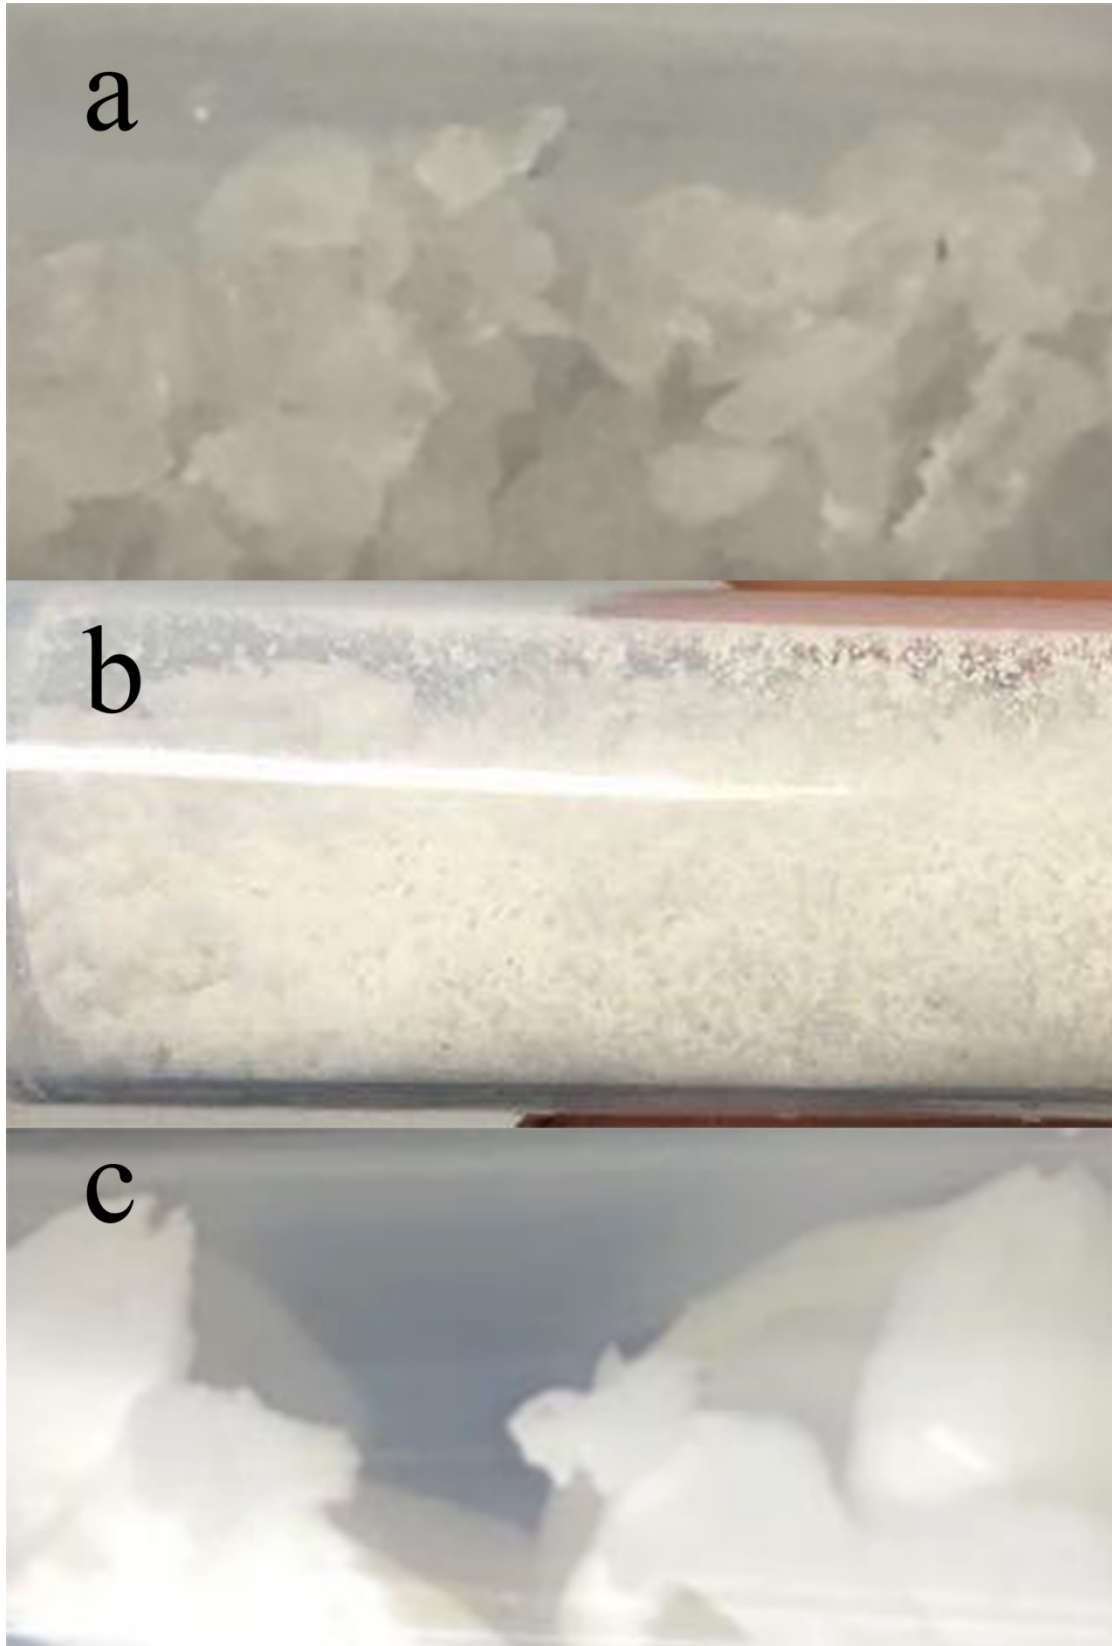

Supplementary Fig. 4

**a**

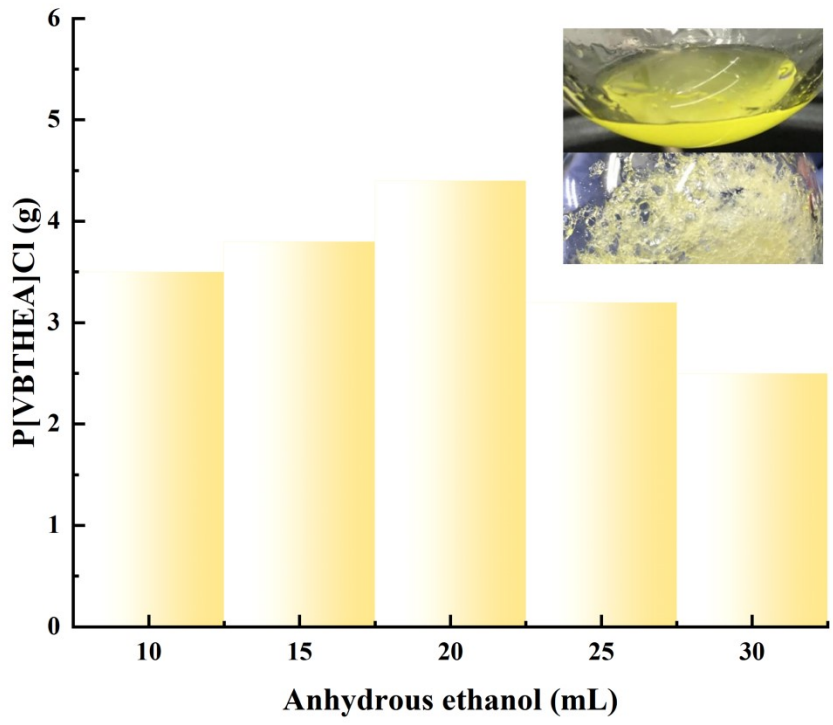

**b**

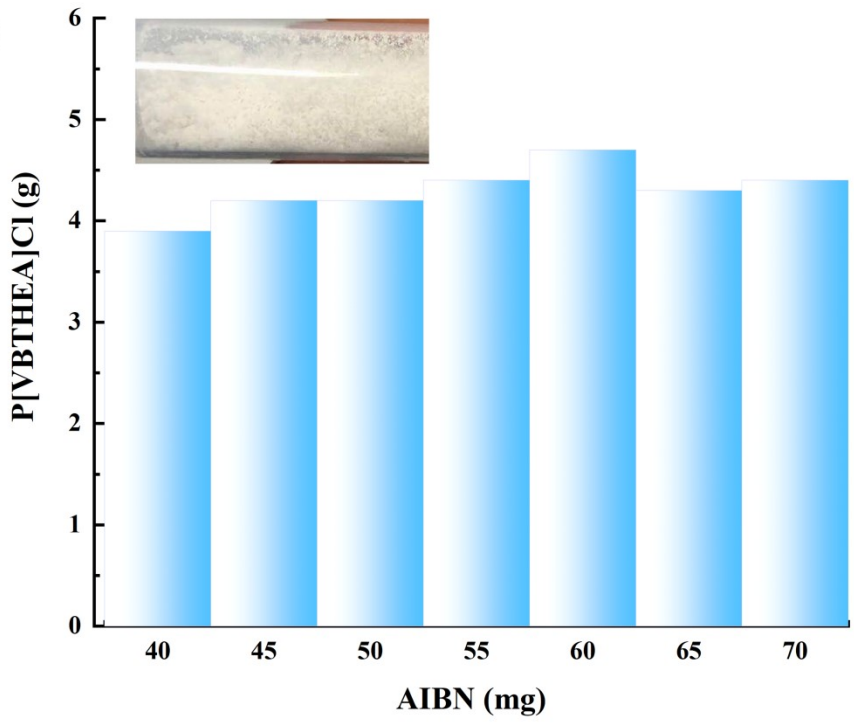

Supplementary Fig. 5

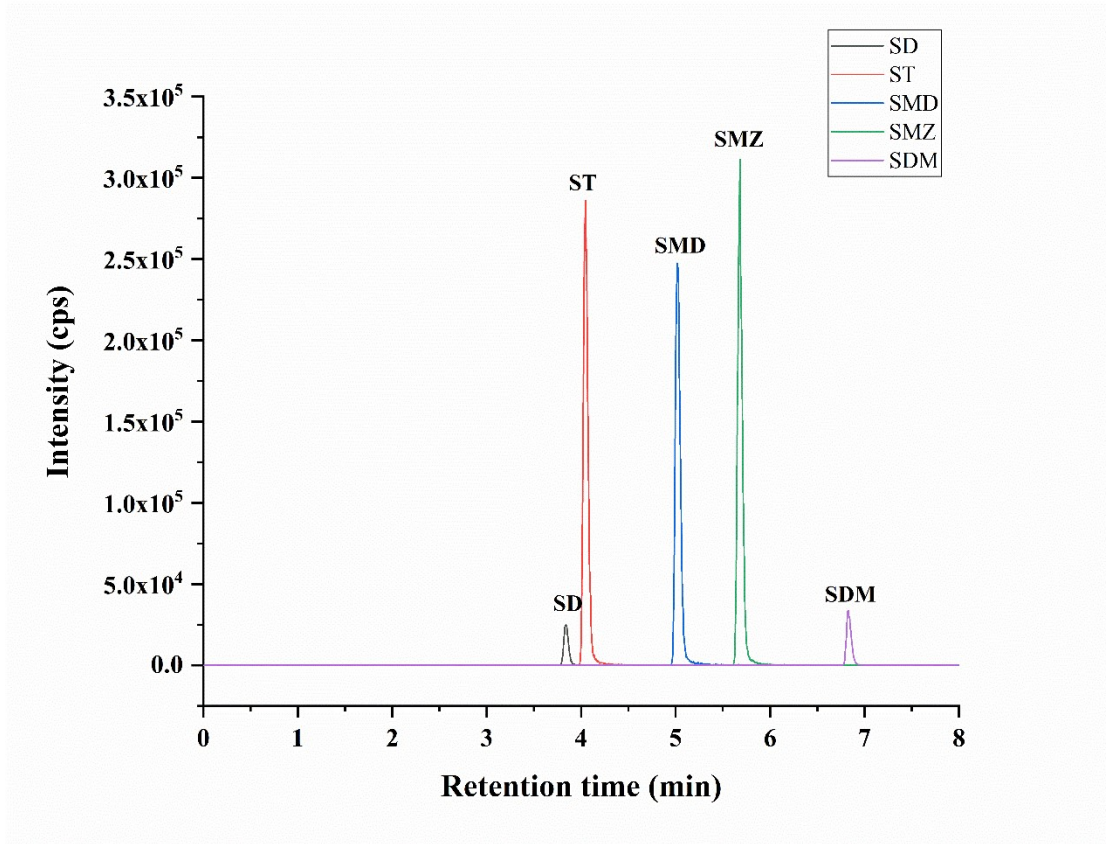

Supplementary Fig. 6

**Supplementary Table 1.** The physico-chemical properties and molecular structures of five SAs

| Compounds                 | CAS No.  | M.W.   | pK <sub>a,1</sub> | pK <sub>a,2</sub> | log <sup>K<sub>ow</sub></sup> | Molecular structure |
|---------------------------|----------|--------|-------------------|-------------------|-------------------------------|---------------------|
| Sulfamethoxydiazine (SMD) | 651-06-9 | 280.3  | 7.02              | -                 | 0.25                          |                     |
| Sulfadimethoxine (SDM)    | 122-11-2 | 310.33 | 6.2               | -                 | 0.78                          |                     |
| Sulfathiazole (ST)        | 72-14-0  | 255.32 | 2.2               | 7.2               | 0.05                          |                     |
| Sulfamethoxazole (SMZ)    | 723-46-6 | 253.28 | 1.6               | 5.7               | 0.89                          |                     |
| Sulfadiazine (SD)         | 68-35-9  | 250.28 | 2.21              | 6.4               | 0.05                          |                     |

**Supplementary Table 2.** Mass spectrometric parameters for five SAs

| Compounds | Ionization mode  | Parent ion (m/z) | Product ion (m/z) | Collision energy (eV) | Cone voltage (V) |
|-----------|------------------|------------------|-------------------|-----------------------|------------------|
| SD        | ESI <sup>+</sup> | 251.2            | 156.2/108.2       | 56                    | 30               |
| ST        | ESI <sup>+</sup> | 256.2            | 156.1/108.2       | 58                    | 33               |
| SMD       | ESI <sup>+</sup> | 281.1            | 156.2/108.2       | 64                    | 36               |
| SMZ       | ESI <sup>+</sup> | 254.2            | 156.1/108.2       | 63                    | 31               |
| SDM       | ESI <sup>+</sup> | 311.1            | 156.1/108.1       | 69                    | 36               |



**Supplementary Table 3.** Effects of varying acid-base mass ratios on the physico-chemical properties of effervescent tablets

| Acid-base ratio/(g:g) | Disintegration time (s) | Solution pH after reaction | CO <sub>2</sub> amount (mg) |
|-----------------------|-------------------------|----------------------------|-----------------------------|
| 1.50:1.00             | 131                     | 4.59                       | 10.30                       |
| 1.25:1.00             | 137                     | 5.19                       | 15.67                       |
| 1.00:1.00             | 153                     | 6.63                       | 12.62                       |
| 1.00:1.25             | 174                     | 6.90                       | 12.51                       |
| 1.00:1.50             | 111                     | 7.03                       | 9.77                        |
